# Supplementary material for: Homology-Dependent Silencing by an Exogenous Sequence in the Drosophila Germline
Source: PubMed Central journal article supplement (PMC3291502; doi:10.1534/g3.111.001925), 2012-03-01
Supplement: supp_2.3.331_TableS1.pdf [file supp_2.3.331_TableS1.pdf]

**Table S1 Non-telomeric single *P-lacZ* transgenes do not repress *PBoL* transgenes.**

| Chromosome                        | Insertion name        | Transgene structure | Cytological site         | Flybase ID  | <i>m2a</i> | <i>w1a</i> | <i>A7.6B</i> |
|-----------------------------------|-----------------------|---------------------|--------------------------|-------------|------------|------------|--------------|
| <b>Euchromatic site</b>           |                       |                     |                          |             |            |            |              |
| Chromosome X                      | <b><i>P-592*</i></b>  | <i>P{IArB}</i>      | 1E                       | FBti0005682 | 443        | 465        | 398          |
|                                   | <b><i>P-1033</i></b>  | <i>P{IArB}</i>      | 35D-E                    | FBti0003389 | 304        | -          | 432          |
| Chromosome 2                      | <b><i>P-1069</i></b>  | <i>P{IArB}</i>      | 28E                      | FBti0004644 | 457        | -          | 540          |
|                                   | <b><i>P-1169</i></b>  | <i>P{IArB}</i>      | 65C-D                    | FBti0005696 | 361        | 326        | 610          |
| Chromosome 3                      | <b><i>P-1173</i></b>  | <i>P{IArB}</i>      | 84E                      | FBti0005134 | 460        | 488        | 455          |
| <b>Heterochromatic site</b>       |                       |                     |                          |             |            |            |              |
| Chromosome X<br>(pericentromeric) | <b><i>P-2004</i></b>  | <i>P{lacW}</i>      | 20A-B ( <i>h26-h32</i> ) | FBti0013902 | 375        | 345        | 312          |
| Chromosome 2<br>(pericentromeric) | <b><i>CH(2)6</i></b>  | <i>P{PZ}</i>        | 2R<br>( <i>h42-h44</i> ) | FBti0003833 | 387        | 390        | 296          |
| Chromosome 3<br>(pericentromeric) | <b><i>P-1784</i></b>  | <i>P{PZ}</i>        | 80A-F                    | FBti0003533 | 604        | 336        | 365          |
| Chromosome 4                      | <b><i>P-6303*</i></b> | <i>P{lacW}</i>      | 101F                     | FBti0002288 | 321        | 427        | 732          |

Single *P-lacZ* transgenes located in euchromatin and heterochromatin were tested for their capacity to induce silencing of *PBoL* insertions. Transgene information is given: chromosomal location (column 1), insertion name (column 2), structure (column 3), cytological location on larval polytene chromosomes (column 4), *Flybase* Identification number (column 5). \* indicates that the insertion is maintained at the homozygous state. All these insertions are unable to repress a *P-lacZ* target transgene in the germline (Josse et al. 2008 and data not shown). TSE on *PBoL* targets was measured in  $G_1$  females produced by crossing females carrying the insertion indicated in column 2 and *PBoL* males indicated at the top of columns 6-8 (*m2a*, *w1a*, and *A7.6B*): no silencing was observed (TSE=0%) irrespective of the *P-lacZ* and *PBoL* insertions tested. The total number of egg chambers scored for each cross is given in columns 6-8.
